# Supplementary material for: Microbial colonization induces histone acetylation critical for inherited gut-germline-neural signaling
Source: PubMed Central journal article supplement (PMC8041202; doi:10.1371/journal.pbio.3001169), 2021-03-31

## S1\_Raw\_images

### Uncropped immunoblot images

Abbreviations: 'E. C' - *E. coli*, 'P. A' - *Pseudomonas aeruginosa*, kD- kilo Dalton, 'X' - excluded sample/s, vec- vector.

Fig 1A.

#### H4K8ac Repeat 1

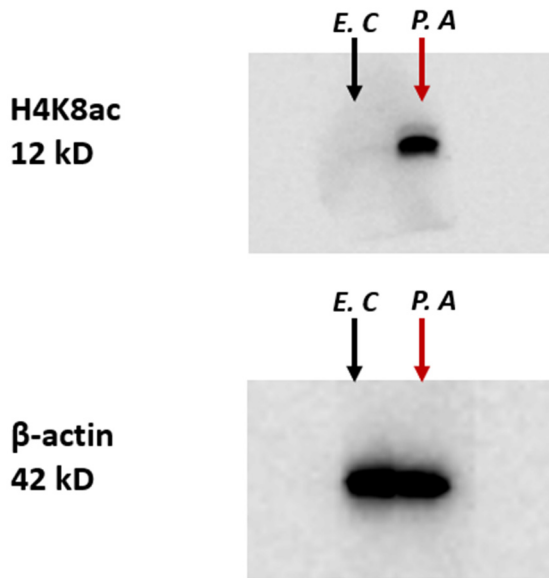

#### Repeat 2

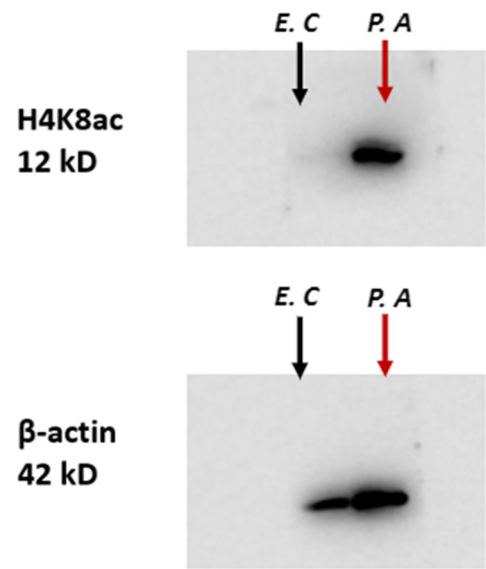

#### Repeat 3

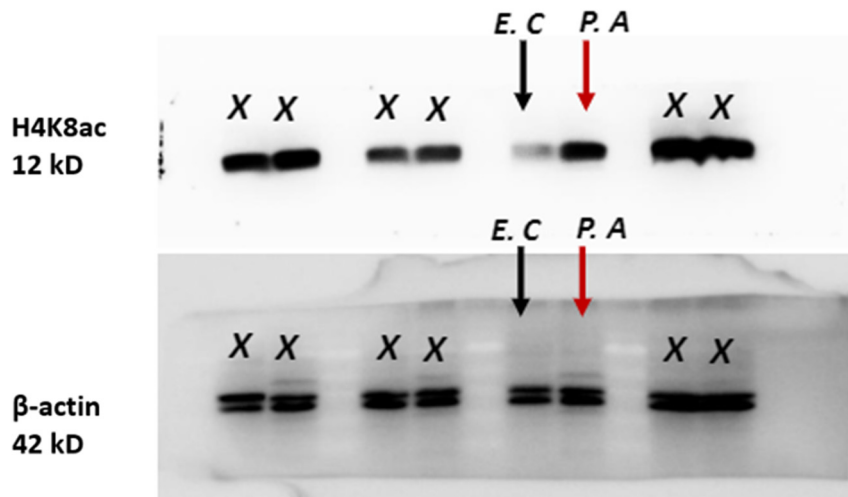

**H3Kme1**  
Repeat 1

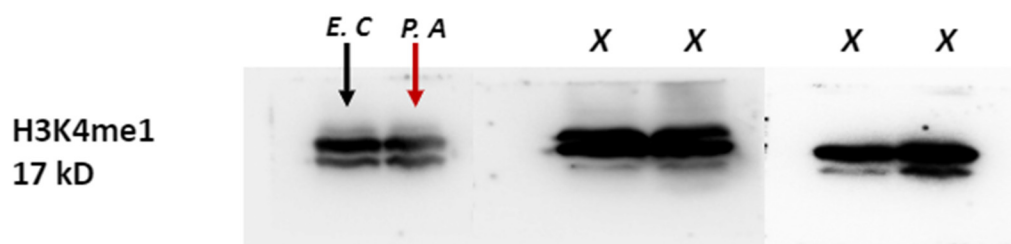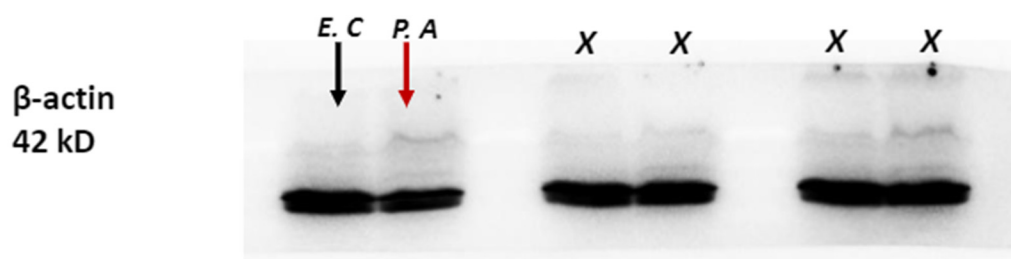

Repeat 2 and 3

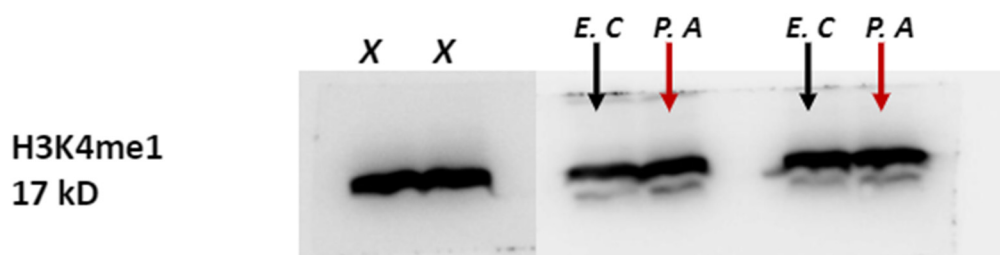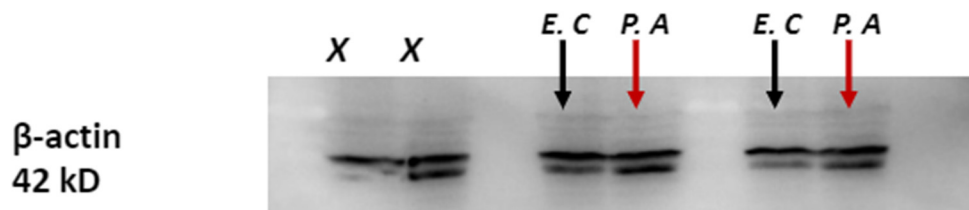

**H3K4me3**  
Repeat 1

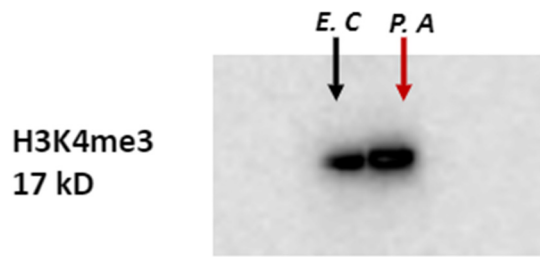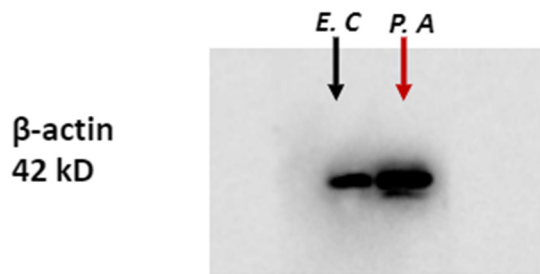

Repeat 2

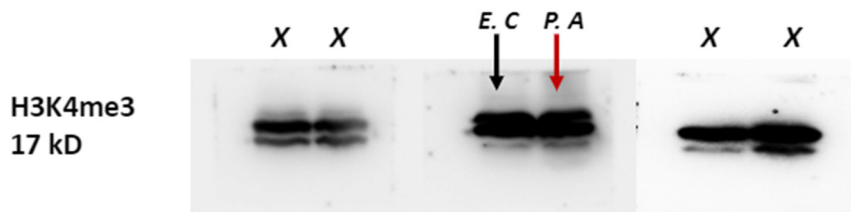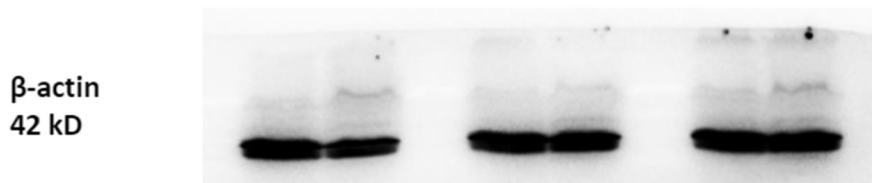

Fig. 1B

Repeat 1

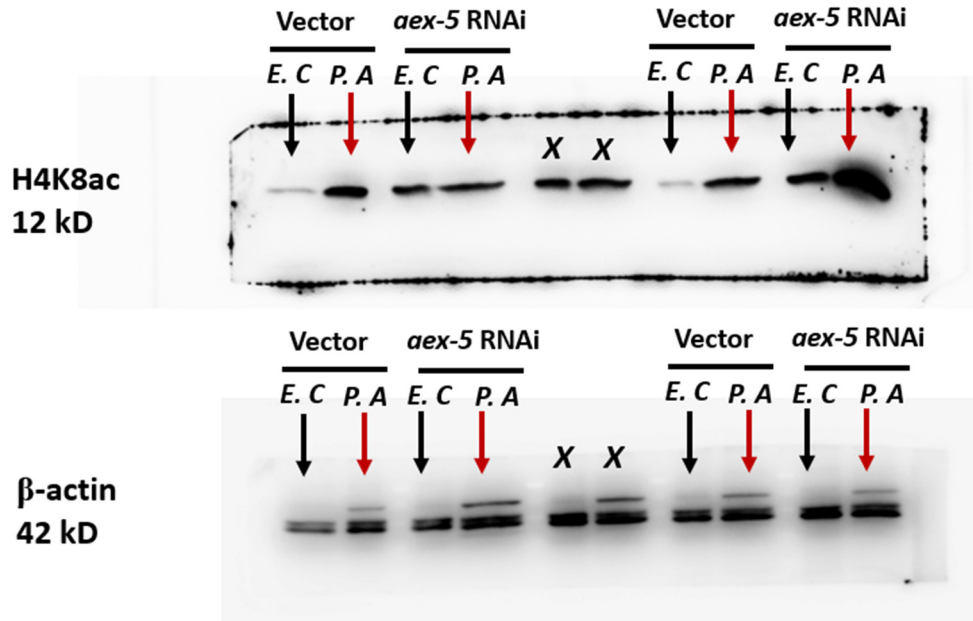

Repeat 2

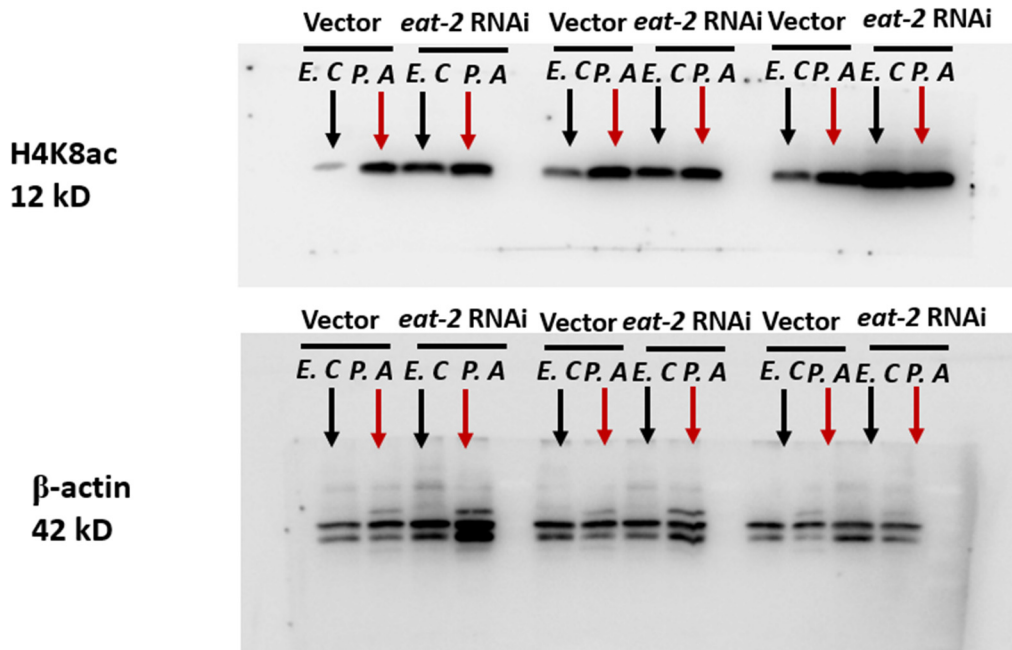

Repeat 3

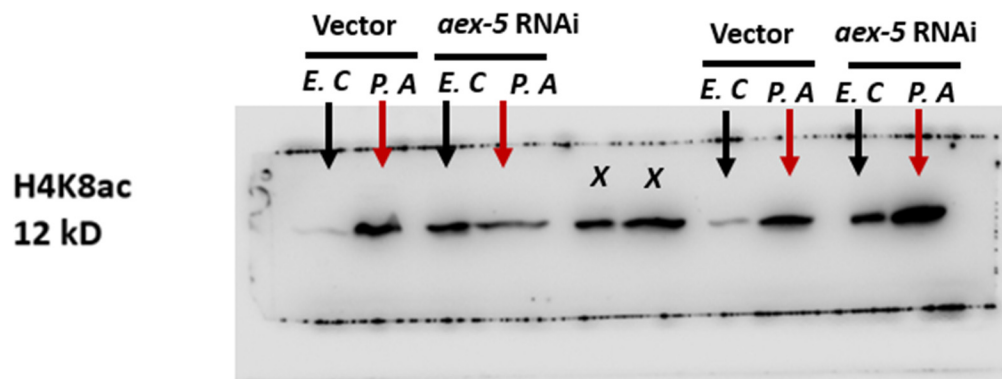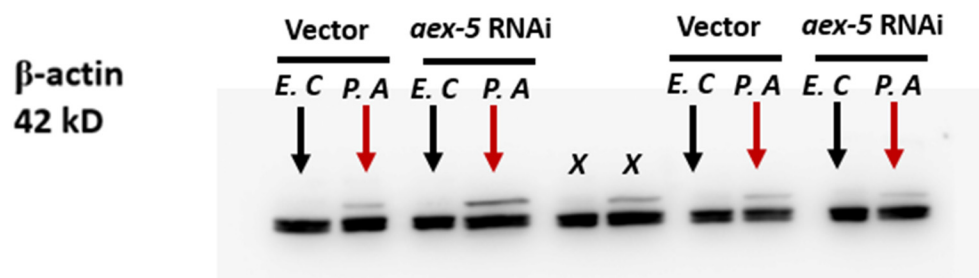

Fig 2A.  
Repeat 1

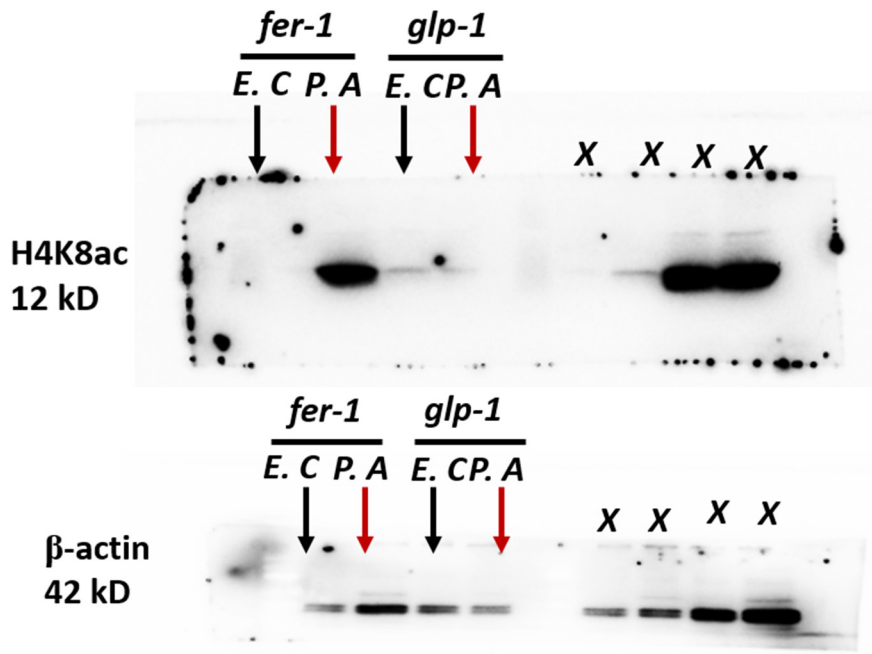

Repeat 2

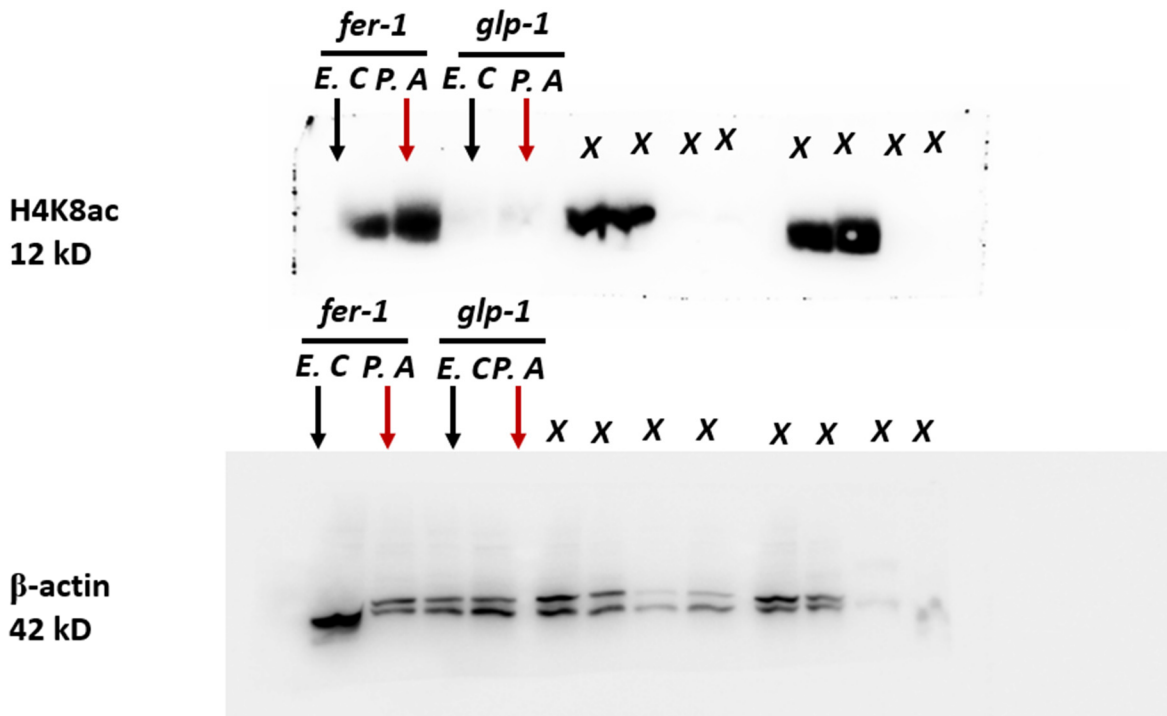

Repeat 3

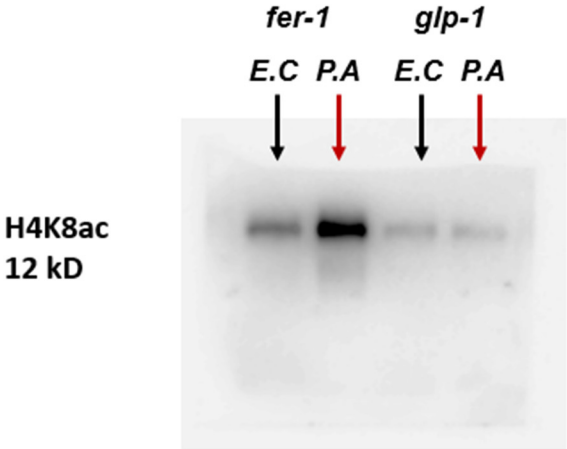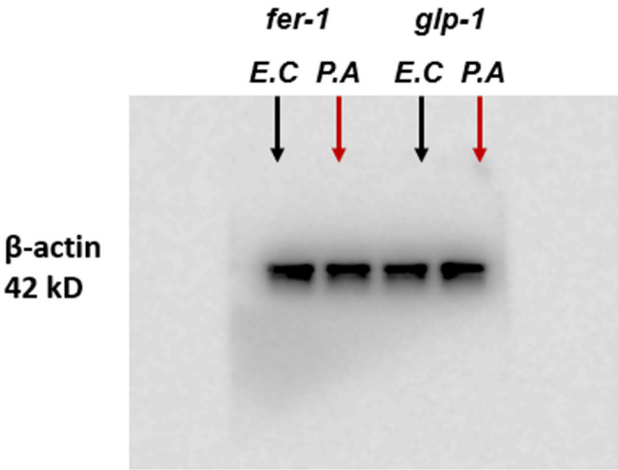

Repeat 4

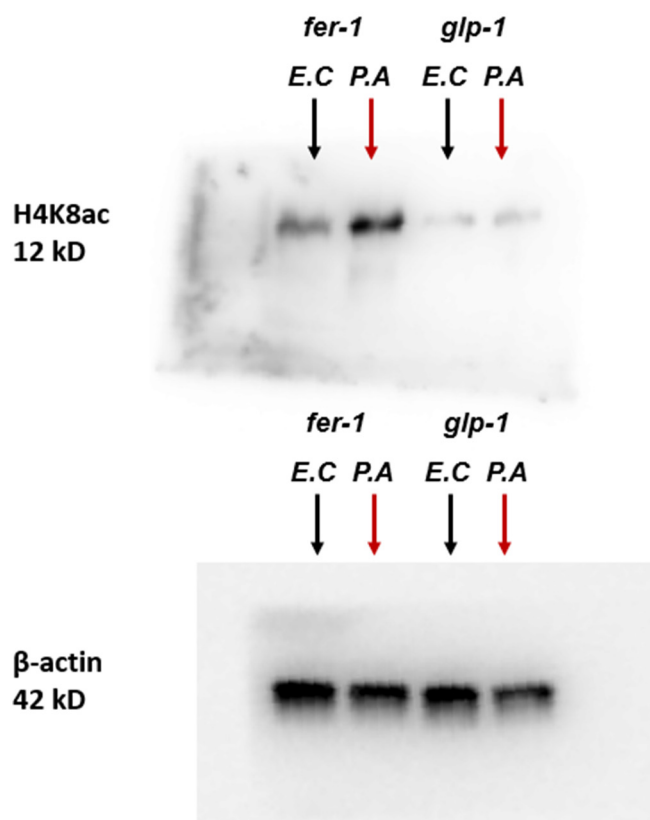



Fig. 3E

Repeat 1

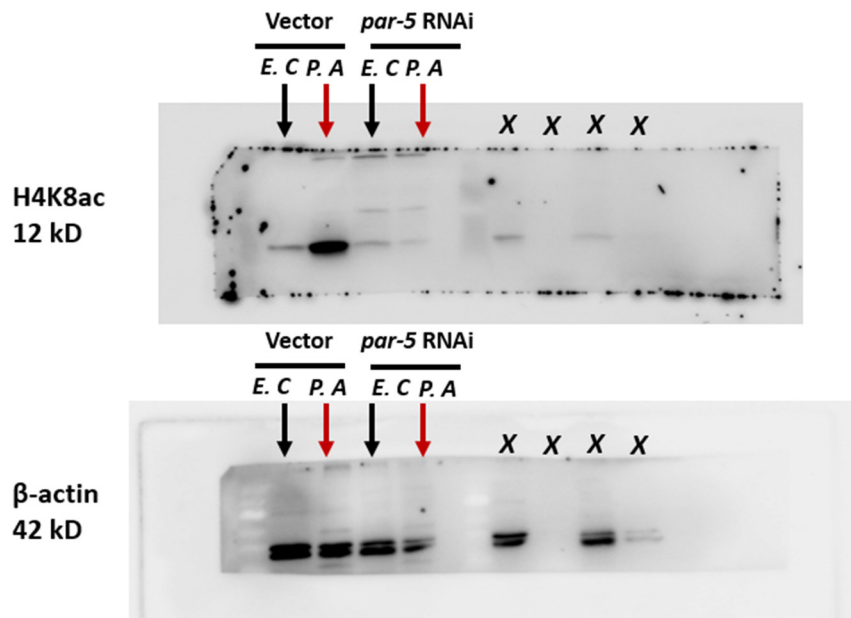

Repeat 2 and Repeat 3

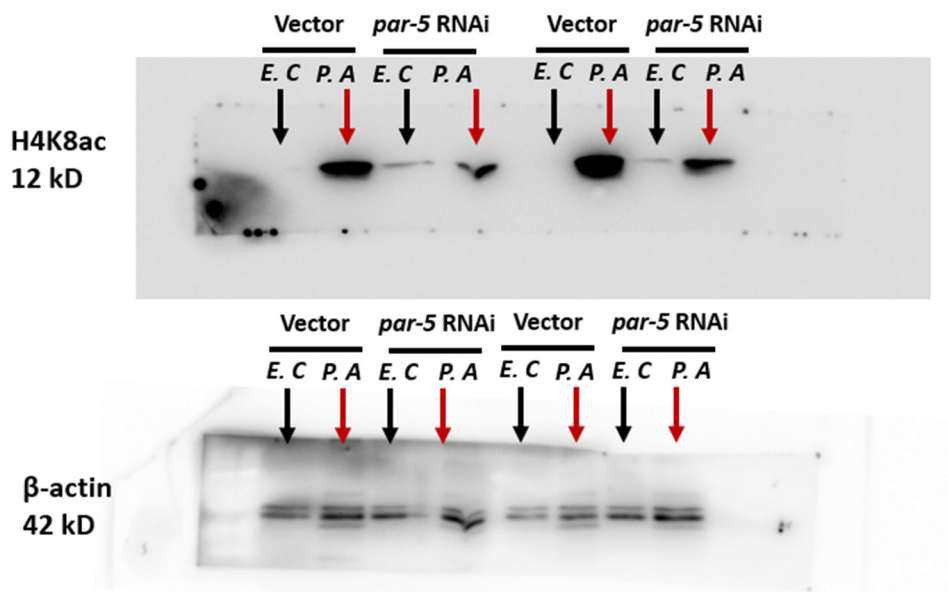

S3A Fig.

Repeat 1

PAR-5  
28 kD

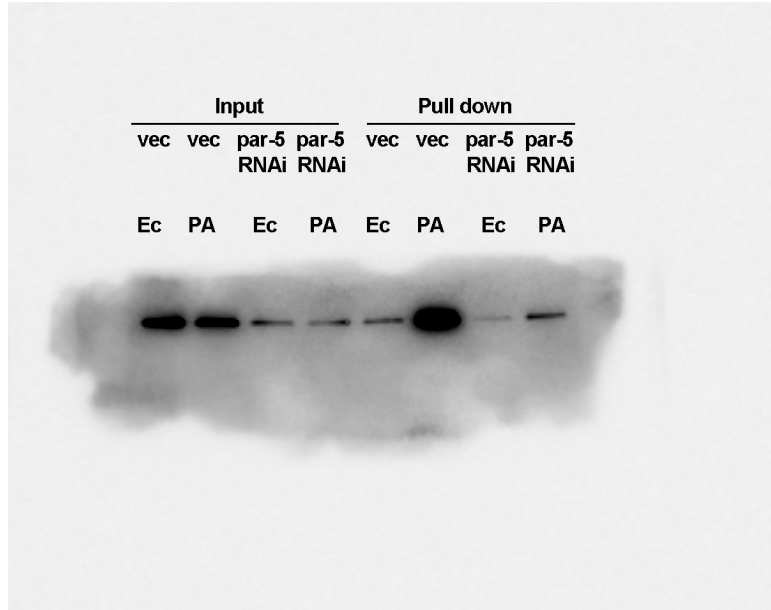

$\beta$ -actin  
42 kD

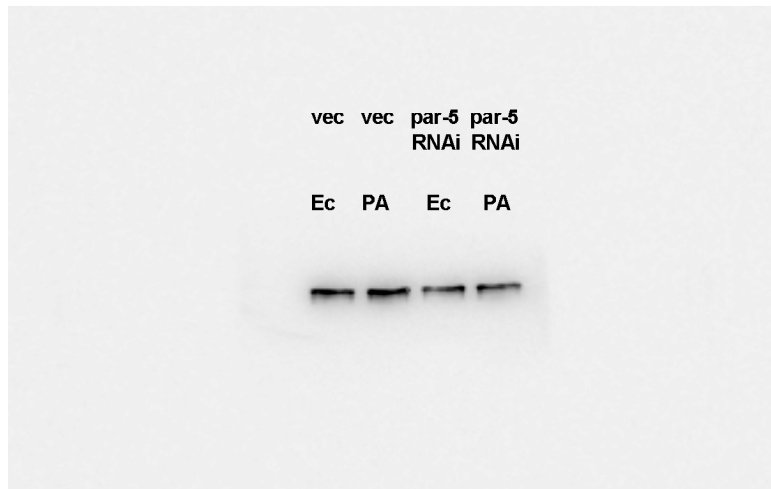

Repeat 2

**PAR-5**  
28 kD

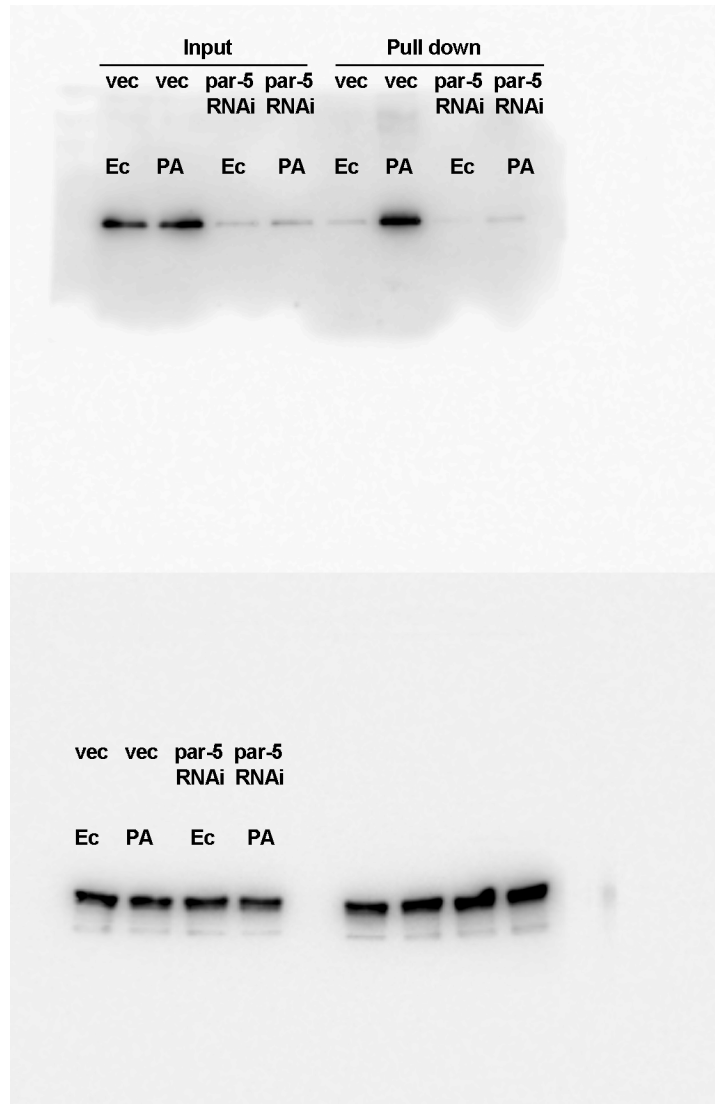

**β-actin**  
42 kD





S5 Fig.

Repeat 1

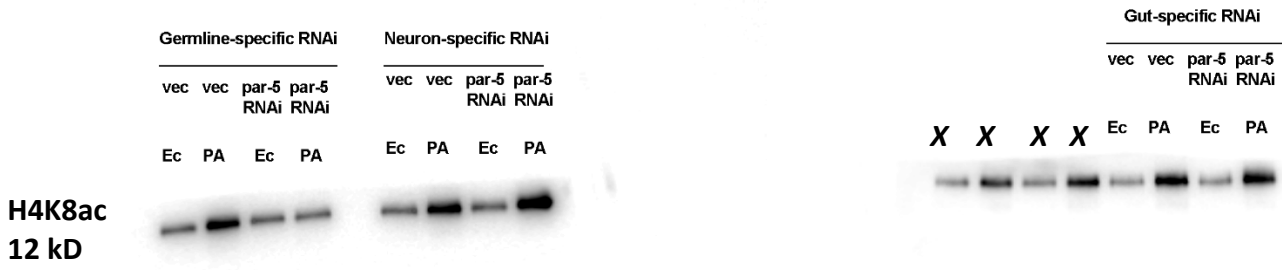

H4K8ac  
12 kD

$\beta$ -actin  
42 kD

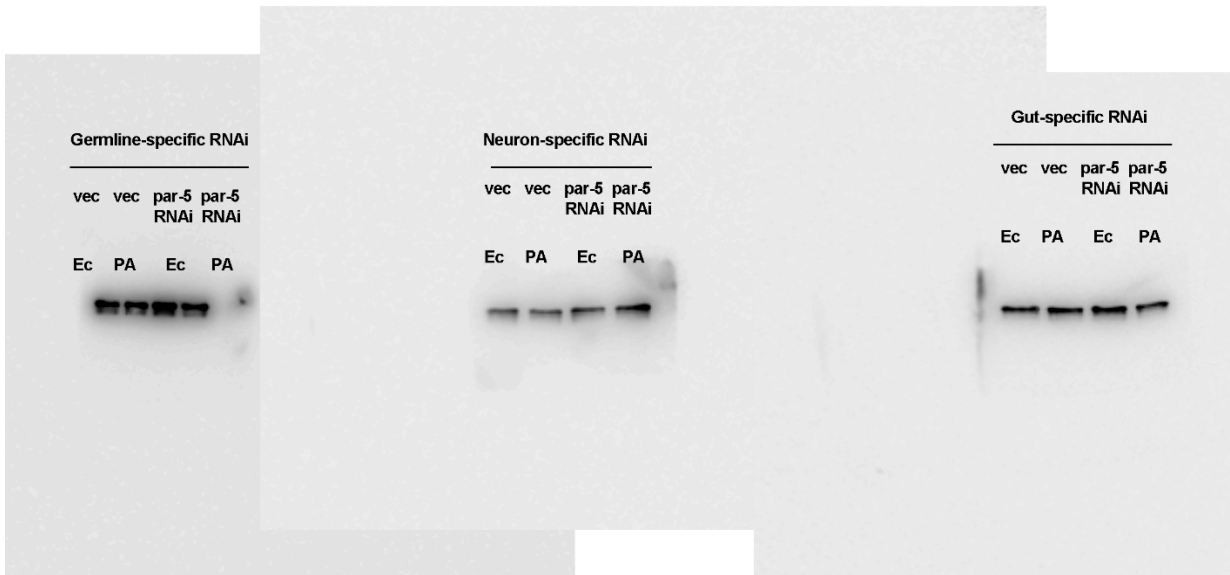



Repeat 3

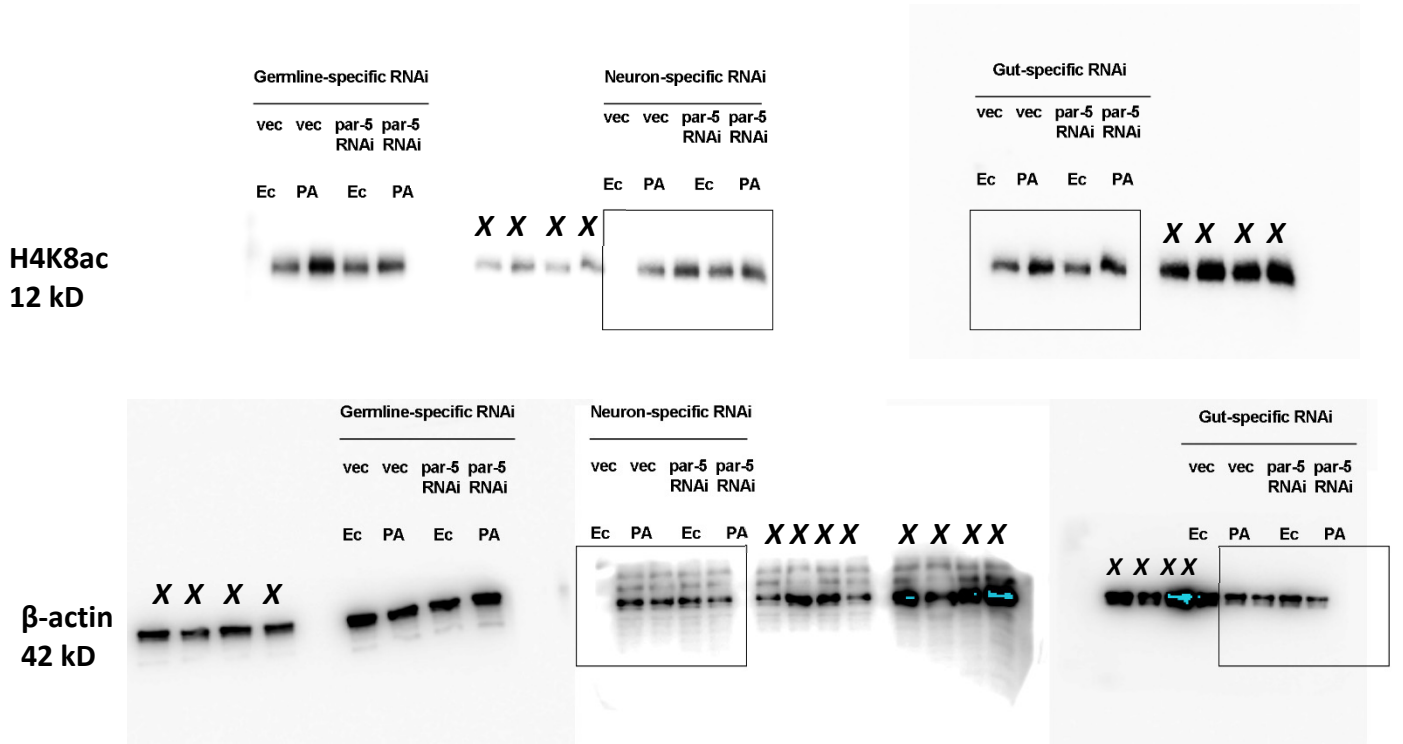

Supplement: pbio.3001169.s008.pdf [file pbio.3001169.s008.pdf]
