# Supplementary material for: Microbial colonization induces histone acetylation critical for inherited gut-germline-neural signaling
Source: PubMed Central journal article supplement (PMC8041202; doi:10.1371/journal.pbio.3001169), 2021-03-31
Supplement: pbio.3001169.s010.pdf [file pbio.3001169.s010.pdf]

**S1 Table. List of H4K8ac interacting protein**

| <b>WormBase Gene ID</b> | <b>Gene Name</b> | <b><i>E. coli</i></b><br><b>(1)</b> | <b><i>E. coli</i></b><br><b>(2)</b> | <b>Average</b><br><b>(<i>E. coli</i>)</b> | <b><i>P. aeruginosa</i></b><br><b>(1)</b> | <b><i>P. aeruginosa</i></b><br><b>(2)</b> | <b>Average</b><br><b>(<i>P. aeruginosa</i>)</b> | <b>Fold Change</b> |
|-------------------------|------------------|-------------------------------------|-------------------------------------|-------------------------------------------|-------------------------------------------|-------------------------------------------|-------------------------------------------------|--------------------|
| WBGene00006921          | vha-12           | 1                                   | 0                                   | 0.5                                       | 10                                        | 1                                         | 5.5                                             | 11.00              |
| WBGene00013025          | vha-13           | 2                                   | 0                                   | 1                                         | 9                                         | 7                                         | 8                                               | 8.00               |
| WBGene00002007          | hsp-3            | 2                                   | 0                                   | 1                                         | 12                                        | 2                                         | 7                                               | 7.00               |
| WBGene00003514          | myo-2            | 1                                   | 0                                   | 0.5                                       | 7                                         | 0                                         | 3.5                                             | 7.00               |
| WBGene00020507          | vha-15           | 1                                   | 0                                   | 0.5                                       | 4                                         | 2                                         | 3                                               | 6.00               |
| WBGene00002008          | hsp-4            | 2                                   | 0                                   | 1                                         | 9                                         | 2                                         | 5.5                                             | 5.50               |
| WBGene00021355          | Y37E3.17         | 2                                   | 0                                   | 1                                         | 8                                         | 2                                         | 5                                               | 5.00               |
| WBGene00002000          | hrp-2            | 0                                   | 1                                   | 0.5                                       | 4                                         | 1                                         | 2.5                                             | 5.00               |
| WBGene00012553          | cox-5A           | 1                                   | 0                                   | 0.5                                       | 5                                         | 0                                         | 2.5                                             | 5.00               |
| WBGene00010317          | idh-1            | 2                                   | 0                                   | 1                                         | 9                                         | 0                                         | 4.5                                             | 4.50               |
| WBGene00003515          | myo-3            | 2                                   | 0                                   | 1                                         | 8                                         | 0                                         | 4                                               | 4.00               |
| WBGene00017166          | aldo-2           | 1                                   | 0                                   | 0.5                                       | 4                                         | 0                                         | 2                                               | 4.00               |
| WBGene00007350          | sucl-1           | 1                                   | 0                                   | 0.5                                       | 4                                         | 0                                         | 2                                               | 4.00               |
| WBGene00004441          | rpl-27           | 1                                   | 0                                   | 0.5                                       | 3                                         | 1                                         | 2                                               | 4.00               |
| WBGene00003920          | par-5            | 1                                   | 1                                   | 1                                         | 5                                         | 2                                         | 3.5                                             | 3.50               |
| WBGene00020950          | dlst-1           | 1                                   | 1                                   | 1                                         | 3                                         | 4                                         | 3.5                                             | 3.50               |
| WBGene00003162          | mdh-2            | 8                                   | 3                                   | 5.5                                       | 26                                        | 11                                        | 18.5                                            | 3.36               |
| WBGene00002083          | inf-1            | 1                                   | 2                                   | 1.5                                       | 7                                         | 3                                         | 5                                               | 3.33               |
| WBGene00004421          | rpl-10           | 3                                   | 2                                   | 2.5                                       | 11                                        | 4                                         | 7.5                                             | 3.00               |
| WBGene00002265          | lec-2            | 1                                   | 1                                   | 1                                         | 4                                         | 2                                         | 3                                               | 3.00               |
| WBGene00000991          | dhs-28           | 2                                   | 0                                   | 1                                         | 4                                         | 2                                         | 3                                               | 3.00               |
| WBGene00010965          | ctc-2            | 1                                   | 0                                   | 0.5                                       | 3                                         | 0                                         | 1.5                                             | 3.00               |
| WBGene00017864          | pcca-1           | 1                                   | 0                                   | 0.5                                       | 3                                         | 0                                         | 1.5                                             | 3.00               |
| WBGene00020366          | acdH-10          | 1                                   | 0                                   | 0.5                                       | 3                                         | 0                                         | 1.5                                             | 3.00               |
| WBGene00000230          | atp-3            | 1                                   | 0                                   | 0.5                                       | 3                                         | 0                                         | 1.5                                             | 3.00               |
